# Supplementary material
Source: PubMed Central journal article supplement (PMC4641011)
Supplement: NIHMS706505-supplement-1.pdf [file NIHMS706505-supplement-1.pdf]

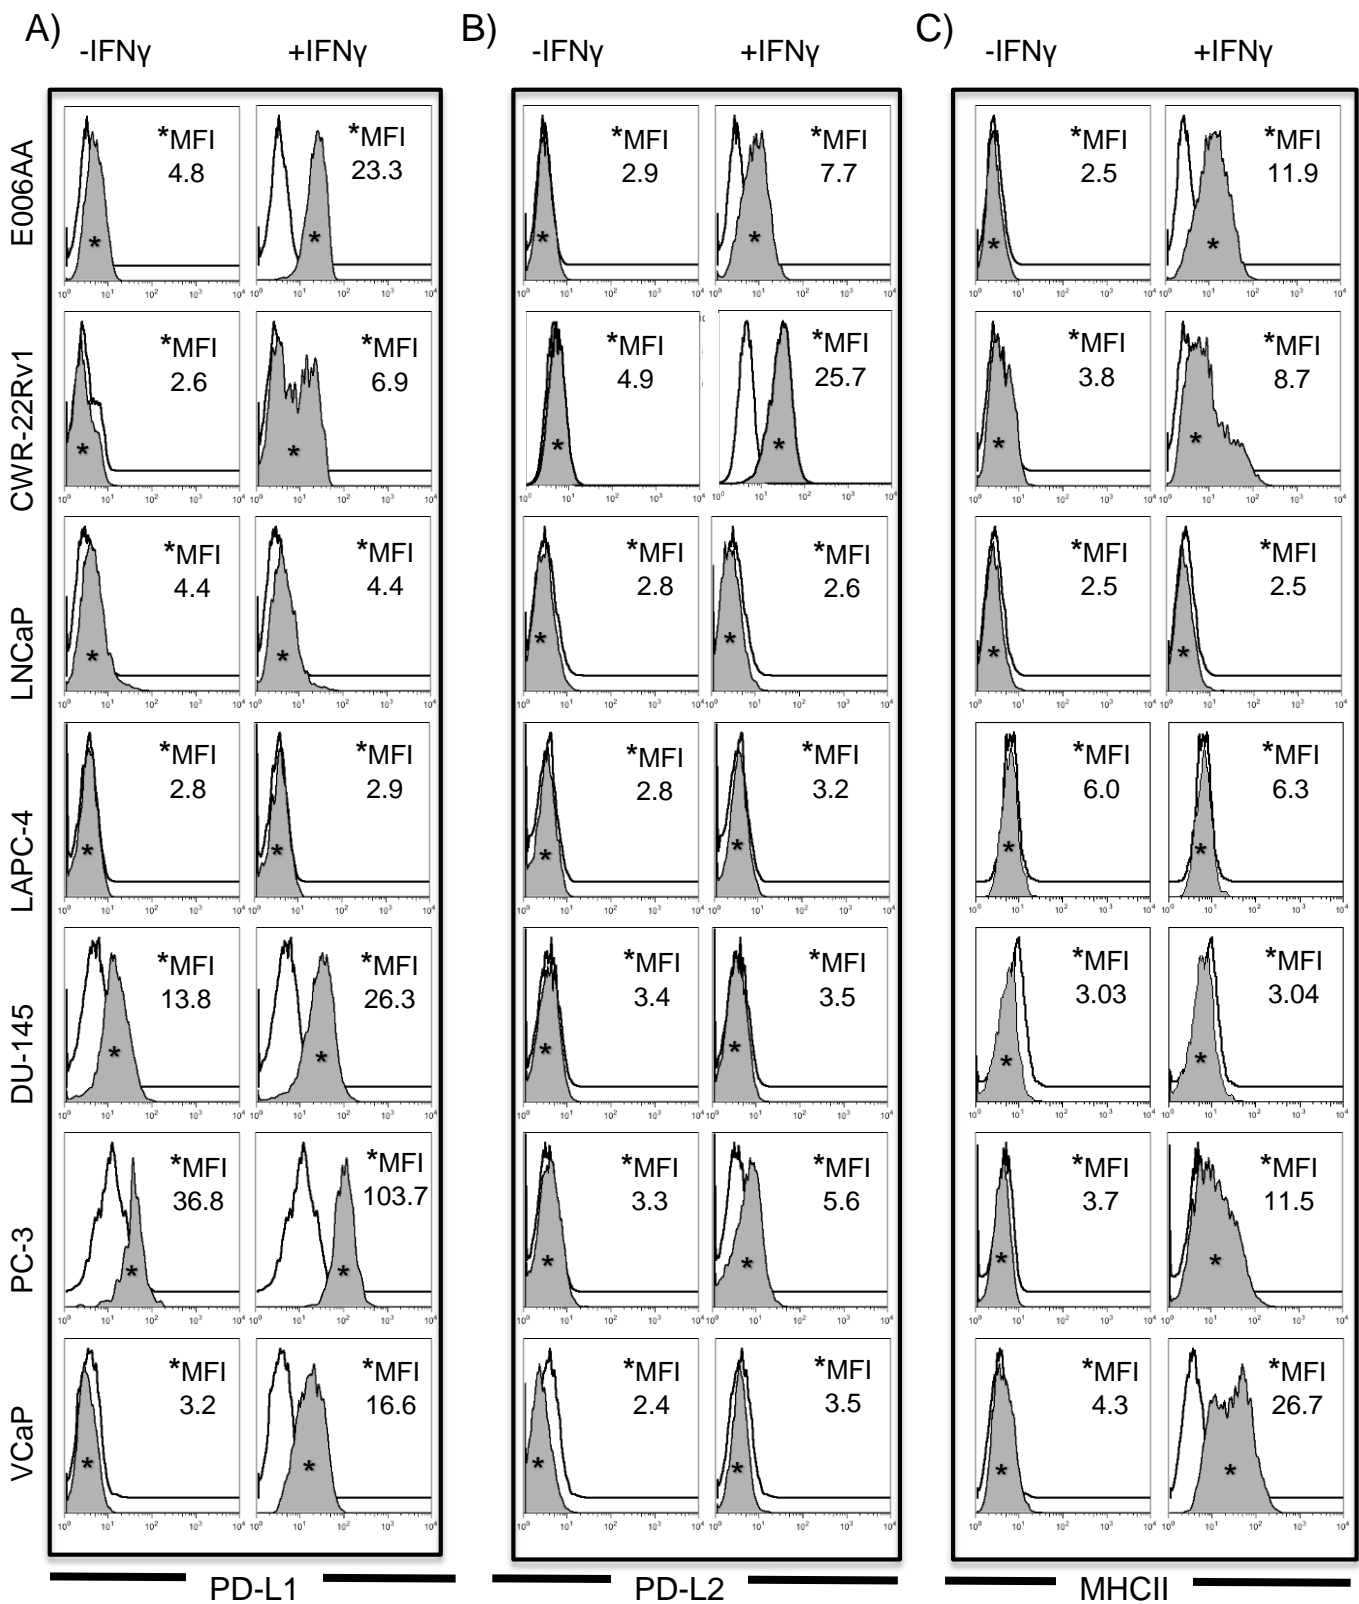

**Supplementary Figure 1 (Fig S-1):**

**A.** Most human prostate cancer cell lines express PD-L1 in response to TH1 immunologic stimuli with interferon gamma and a few express it at rest in culture.

**PD-L1 versus Isotype**

**B.** A few human prostate cancer cell lines express low levels PD-L2 in response to TH1 immunologic stimuli with interferon gamma.

**MFI = Mean Fluorescence Intensity**

**C.** Some human prostate cancer cell lines have express MHCII in response to TH1 immunologic stimuli with interferon gamma.
