# Supplementary material
Source: PubMed Central journal article supplement (PMC4641011)
Supplement: NIHMS706505-supplement-2.pdf [file NIHMS706505-supplement-2.pdf]

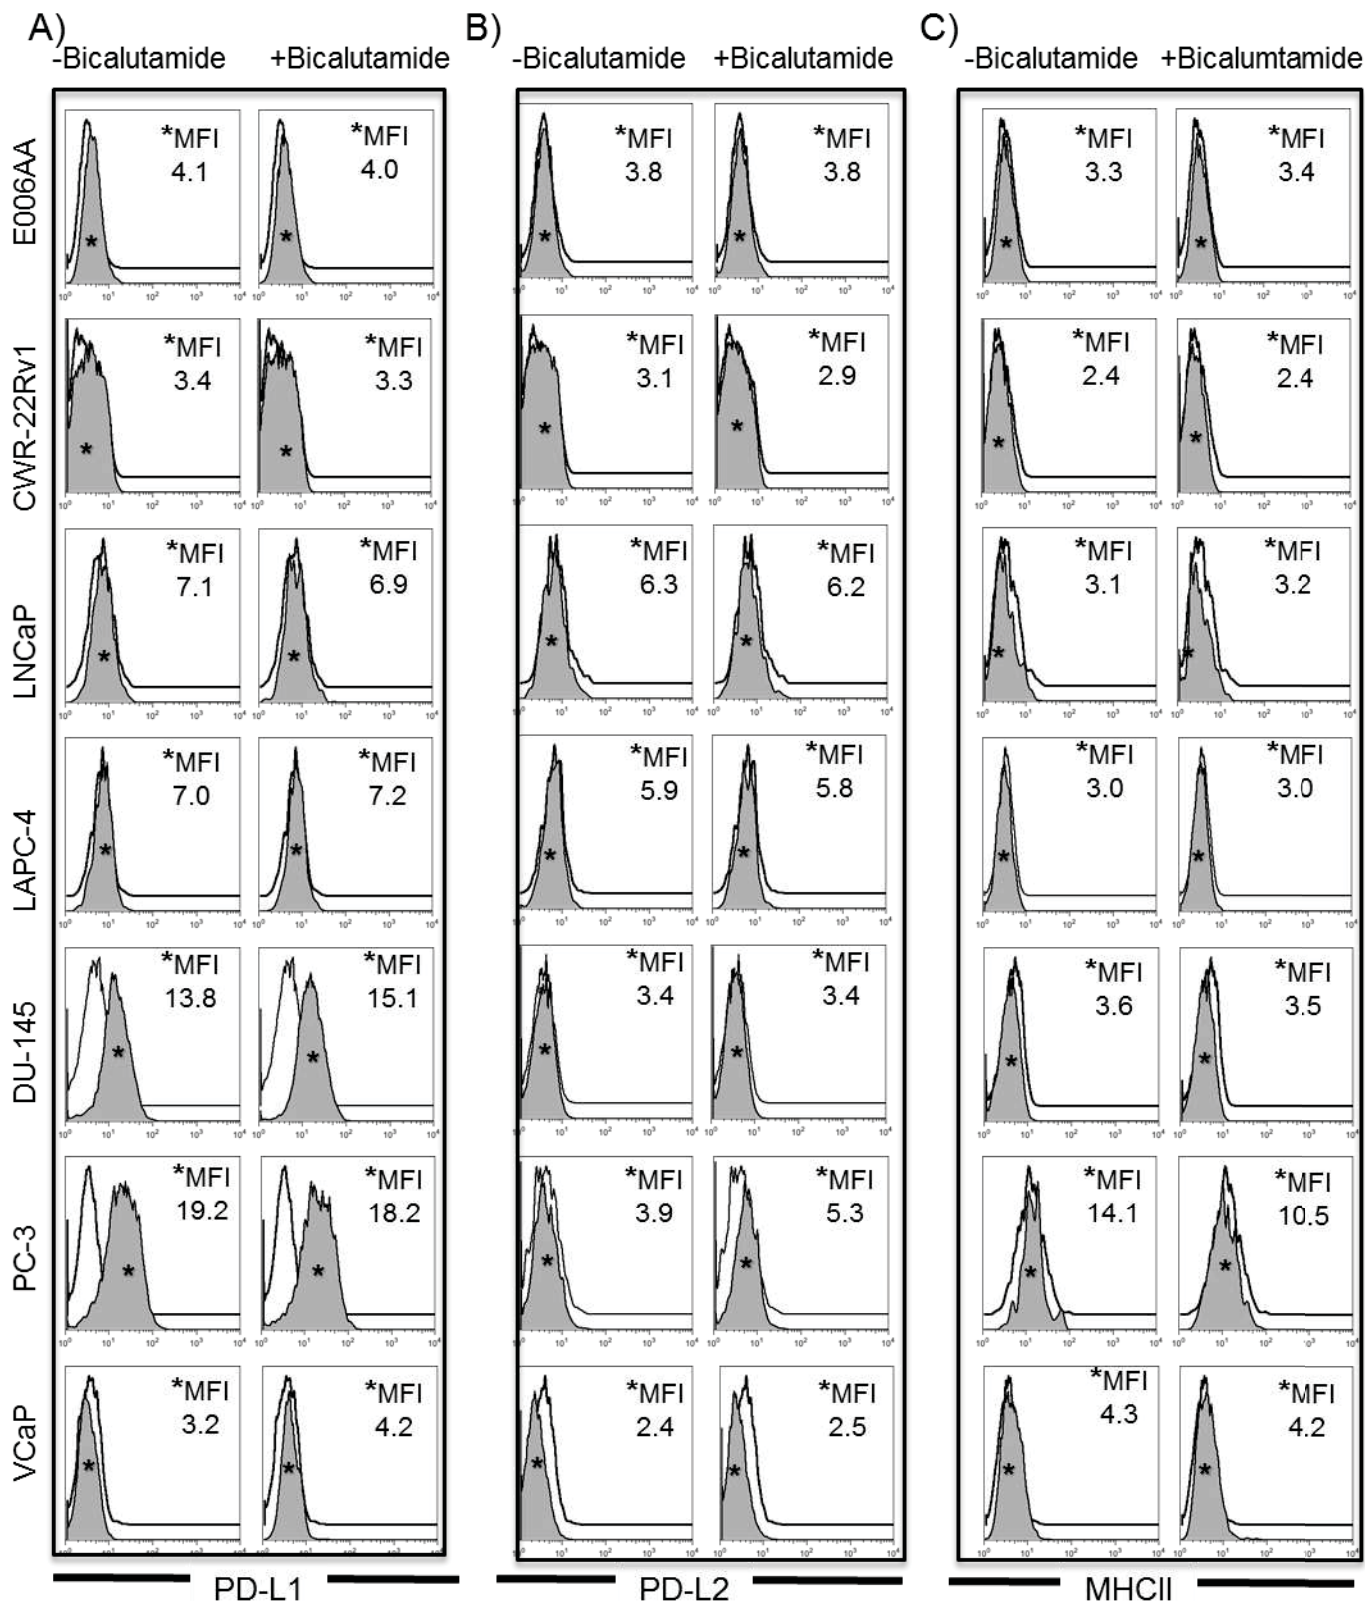

**Supplementary Figure 2 (Fig S-2):**

**A.** The anti-androgen bicalutamide neither induces nor inhibits the expression of PD-L1 in human prostate cancer cell lines.

**PD-L1 versus Isotype**

**B.** The anti-androgen bicalutamide neither induces nor inhibits the expression of PD-L2 in human prostate cancer cell lines.

**MFI = Mean Fluorescence Intensity**

**C.** The anti-androgen Casodex neither induces nor inhibits the expression of MHCII in human prostate cancer cell lines.
