# Supplementary material
Source: PubMed Central journal article supplement (PMC4641011)
Supplement: NIHMS706505-supplement-4.pdf [file NIHMS706505-supplement-4.pdf]

|    | PD-L1 | PTEN          | Hormonally Treated | Gleason   | Tumor Stage | Comments                                                                                                                        |
|----|-------|---------------|--------------------|-----------|-------------|---------------------------------------------------------------------------------------------------------------------------------|
| 1  | 5%    | Intact        | -                  | 7 (3+4)   | T2c, N0, MX | PD-L1 on benign epithelial cells and inflammatory cells in BPH nodules and on epithelial cells in PIA. No PD-L1 on tumor cells. |
| 2  | 1%    | Loss          | -                  | 9 (4+5)   | T3b, N0, MX |                                                                                                                                 |
| 3  | <1%   | Intact        | -                  | 6 (3+3)   | T2c, NX, MX | PD-L1 on benign epithelium with corresponding inflammation                                                                      |
| 4  | 0     | Indeterminate | +                  | 6 (3+3)** | T2c, NX, MX | Indeterminate for tumor                                                                                                         |
| 5  | 0     | Indeterminate | +                  | 6 (3+3)** | T2a, NX, MX | No tumor, BPH nodules only                                                                                                      |
| 6  | <1%   | Loss          | +                  | 6 (3+3)** | T3b, N0, MX | PD-L1 positive on epithelial cells in PIA                                                                                       |
| 7  | 10%   | Intact        | -                  | 9 (4+5)   | T3b, N0, MX | True tumor cell staining                                                                                                        |
| 8  | 5%    | Intact        | -                  | 9 (4+5)   | T3c, N0, MX | True tumor cell staining                                                                                                        |
| 9  | 0*    | Loss          | -                  | 7 (4+3)   | T3c, N0, MX | *Some PD-L1, <1%, on inflammatory cells only, none on tissue.                                                                   |
| 10 | <1%   | Intact        | -                  | 7 (4+3)   | T3c, N0, MX | Focal PD-L1 on epithelial cells in PIA                                                                                          |
| 11 | 0     | Intact        | -                  | 7 (3+4)   | T2c, N0, MX | Tumor present. Corresponding inflammation                                                                                       |

|    |     |        |   |           |              |                                                                                  |
|----|-----|--------|---|-----------|--------------|----------------------------------------------------------------------------------|
| 12 | 0   | Intact | - | 6 (3+3)   | T2a, NX, MX  |                                                                                  |
| 13 | <1% | Loss   | + | 7 (3+4)** | T2c+, N0, MX |                                                                                  |
| 14 | 0   | Intact | + | 7 (3+4)** | T2c+, N0, MX | Signs of inflammation                                                            |
| 15 | 0   | Intact | + | 7 (4+3)** | T2c, N0, MX  |                                                                                  |
| 16 | 0   | Intact | + | 7 (4+3)** | T2c, N0, MX  | PIA                                                                              |
| 17 | <1% | Intact | + | 9 (4+5)** | T4, N0, MX   | PD-L1 on epithelial cells in PIA                                                 |
| 18 | <1% | Intact | + | 9 (4+5)** | T4, N0, MX   | Most PD-L1 in areas of PIA (on epithelial cells) with corresponding inflammation |
| 19 | 1%  | Intact | + | 9 (4+5)** | T4, N0, MX   | PD-L1 expression in areas of PIA with corresponding inflammation.                |
| 20 | 0*  | Loss   | + | 9 (5+4)** | T2a, N0, MX  | *Possible cytoplasmic PD-L1 expression, 1%, but no membranous expression.        |

\*\* Gleason scores for hormonally treated tumors derived from biopsies.
